# Supplementary material for: Dopaminergic Neurons in Zona Incerta Drives Appetitive Self‐Grooming
Source: PubMed Central journal article supplement (PMC11422805; doi:10.1002/advs.202308974), 2024-08-05
Supplement: ADVS-11-2308974-s001.pdf [file ADVS-11-2308974-s001.pdf]

## Supporting Information

for *Adv. Sci.*, DOI 10.1002/adv.202308974

Dopaminergic Neurons in Zona Incerta Drives Appetitive Self-Grooming

Zhiying Jiang\*, Michelle He, Claire Young, Jing Cai, Yuanzhong Xu, Yanyan Jiang, Hongli Li,  
Maojie Yang and Qingchun Tong\*

## Supporting Information

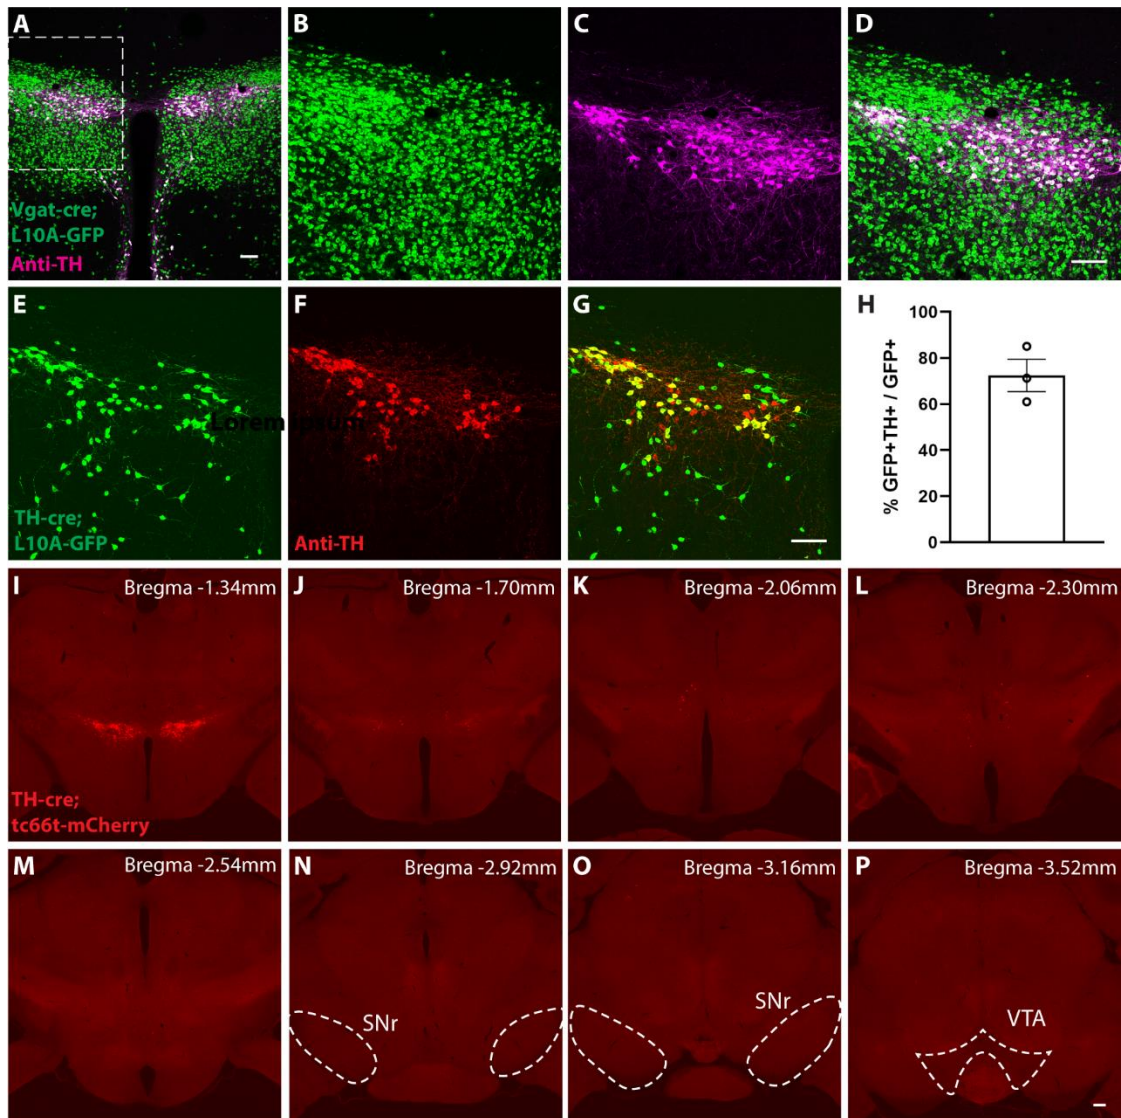

**Fig S1. Validation of TH-cre mouse line and specificity of AAV infection of ZI<sup>TH</sup> neurons.**

A-D) ZI<sup>TH</sup> neurons colocalize with Vgat, a GABAergic neuron marker;

E-H) Validation of TH-cre mouse line (N= 3 mice) (scale bar, 100  $\mu$ m);

I-P) Confocal images from anterior to posterior to show the specificity of AAV infection. No transduction exists in the SNr or VTA (scale bar, 200  $\mu$ m).

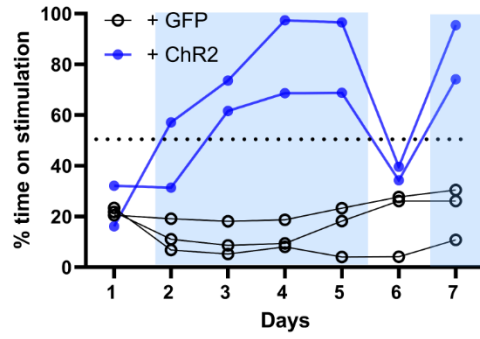

**Fig S2. Acute inhibition of ZI<sup>TH</sup> neurons does not induce conditioned place preference**

Daily training increases time spent on the stimulated side in TH-ChR2 mice, but the preference doesn't convert to contextual memory. Laser stimulation resumes the preference on day 7 (control: N=3 mice, ChR2: N=2 mice)

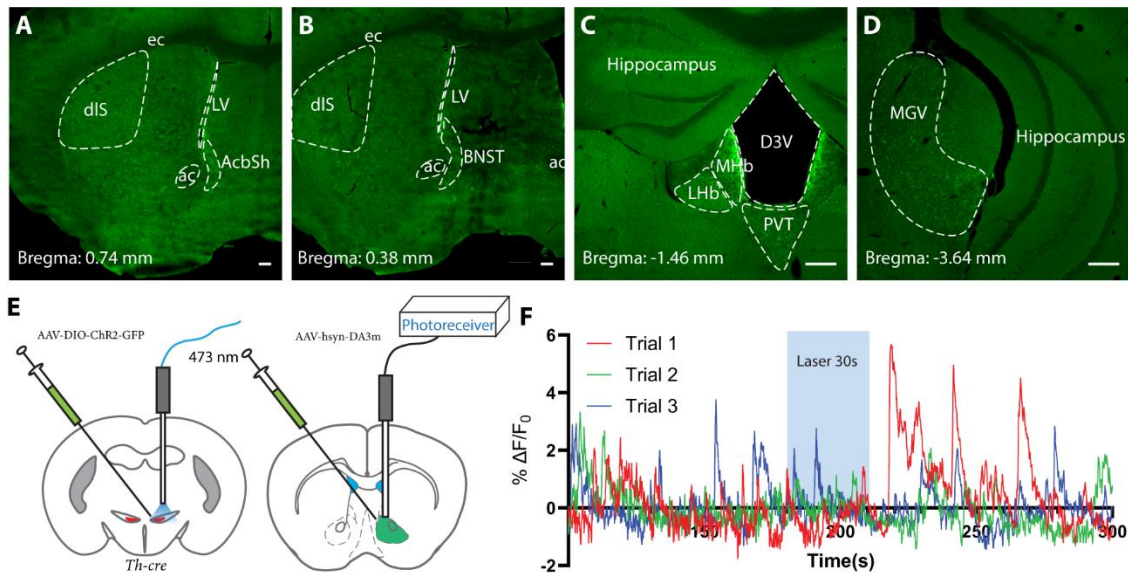

**Fig S3. Z1<sup>TH</sup> neurons does not project to dIS or hippocampus, or elicit reliable DA release in the NAc.**

A-D) Z1<sup>TH</sup> neurons do not project to the dorsolateral striatum (dIS) or hippocampus. Abbrev: ac, anterior commissure; LV, lateral ventricle; ec, external capsule; AcbSh, nucleus accumbens, shell; BNST, bed nucleus of stria terminalis; D3V, the third ventricle, dorsal part; MHb, medial habenula nucleus; LHB, lateral habenula nucleus; PV, paraventricular thalamic nucleus; MGV, medial geniculate nucleus, ventral part. scale bar, 200 $\mu$ m.

E) Schematic diagram of strategy to measure DA release in the NAc with Z1<sup>TH</sup> neurons activation;

F) DA signaling before, during, and after optogenetic activation of Z1<sup>TH</sup> neurons (n=3 trials from one mouse).

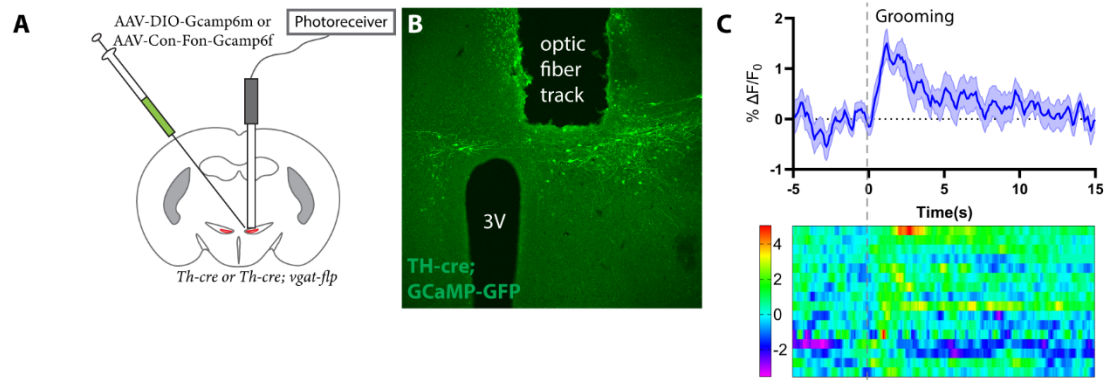

**Fig S4. ZI<sup>TH</sup> neurons showed increased neuronal activity during spontaneous grooming.**

A) Experimental setup of recording calcium signalings from ZI<sup>TH</sup> neurons;

B) a representative image of GCaMP expression in the ZI and the location of implanted optic fiber;

C) ZI<sup>TH</sup> neurons showed increased neuronal activity during spontaneous grooming (n = 16 trials from N = 2 mice).

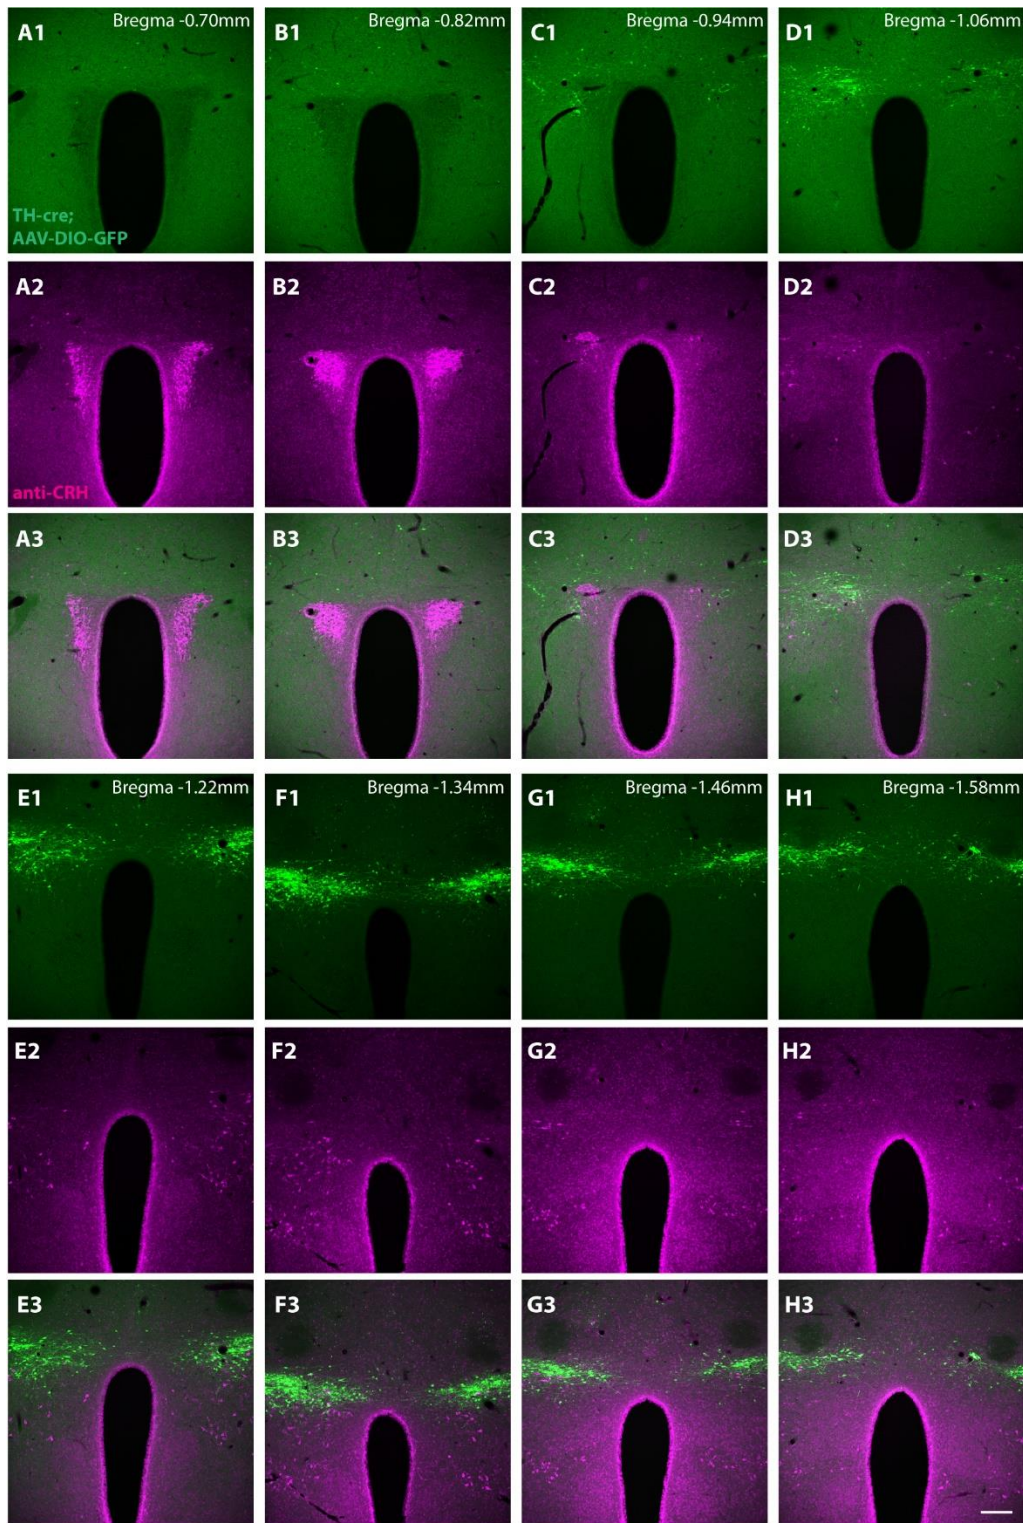

**Fig S5.** Confocal images from anterior to posterior show that PVH CRH neurons (magenta) do not co-localize with ZI<sup>TH</sup> neurons (green) (scale bar = 200  $\mu$ m).

Table S1. Downstream targets of ZI<sup>TH</sup> neurons (anterior to posterior).

| Brain Division | Abbreviation | Region name                             |
|----------------|--------------|-----------------------------------------|
| Striatum       | ACB          | Nucleus accumbens                       |
| Striatum       | LSv          | Lateral septal nucleus, ventral part    |
| Pallidum       | BST          | Bed nuclei of the stria terminalis      |
| Hypothalamus   | MPO          | Medial preoptic area                    |
| Hypothalamus   | PVH          | Paraventricular hypothalamic nucleus    |
| Hypothalamus   | AHN          | Anterior hypothalamic nucleus           |
| Hypothalamus   | LHA          | Lateral hypothalamic area               |
| Hypothalamus   | DMH          | Dorsomedial nucleus of the hypothalamus |
| Hypothalamus   | ARH          | Arcuate hypothalamic nucleus            |
| Hypothalamus   | ZI           | Zona incerta                            |
| Thalamus       | PVT          | Paraventricular nucleus of the thalamus |
| Thalamus       | LHb          | lateral habenular nucleus               |
| Hypothalamus   | PH           | Posterior hypothalamic nucleus          |
| Midbrain       | PAG          | Periaqueductal gray                     |
| Thalamus       | MGv          | Medial geniculate complex, ventral part |
| fiber tracts   | cic          | inferior colliculus commissure          |
| Pons           | LC           | Locus ceruleus                          |
| Medulla        | NTS          | Nucleus of the solitary tract           |
| Medulla        | LRN          | Lateral reticular nucleus               |



Table S2. Top 50 brain regions outside of ZI that send monosynaptic projections to ZI<sup>TH</sup> neurons.

| Brain Division | Abbreviation | Region Name                                                  |
|----------------|--------------|--------------------------------------------------------------|
| Hypothalamus   | VMH          | Ventromedial hypothalamic nucleus                            |
| Midbrain       | PAG          | Periaqueductal gray                                          |
| Hypothalamus   | PVH          | Paraventricular hypothalamic nucleus                         |
| Hypothalamus   | PH           | Posterior hypothalamic nucleus                               |
| Hypothalamus   | AHN          | Anterior hypothalamic nucleus                                |
| Hypothalamus   | LHA          | Lateral hypothalamic area                                    |
| Hypothalamus   | DMH          | Dorsomedial nucleus of the hypothalamus                      |
| Midbrain       | MRN          | Midbrain reticular nucleus                                   |
| Striatum       | LSr          | Lateral septal nucleus, rostral (rostroventral) part         |
| Hypothalamus   | PVHd         | Paraventricular hypothalamic nucleus, descending division    |
| Hypothalamus   | MPO          | Medial preoptic area                                         |
| Hypothalamus   | MPN          | Medial preoptic nucleus                                      |
| Pallidum       | BST          | Bed nuclei of the stria terminalis                           |
| Thalamus       | PVT          | Paraventricular nucleus of the thalamus                      |
| Pons           | PRNc         | Pontine reticular nucleus, caudal part                       |
| Pons           | PB           | Parabrachial nucleus                                         |
| Hypothalamus   | ARH          | Arcuate hypothalamic nucleus                                 |
| Hypothalamus   | PeF          | Perifornical nucleus                                         |
| Midbrain       | CUN          | Cuneiform nucleus                                            |
| Hypothalamus   | TU           | Tuberal nucleus                                              |
| Hypothalamus   | LPO          | Lateral preoptic area                                        |
| Midbrain       | SCdg         | Superior colliculus, motor related, deep gray layer          |
| Striatum       | ACB          | Nucleus accumbens                                            |
| Midbrain       | PPN          | Pedunclopontine nucleus                                      |
| Medulla        | GRN          | Gigantocellular reticular nucleus                            |
| Midbrain       | SCiw         | Superior colliculus, motor related, intermediate white layer |
| Pallidum       | SI           | Substantia innominata                                        |
| Hypothalamus   | PVi          | Periventricular hypothalamic nucleus, intermediate part      |
| Pons           | PRNr         | Pontine reticular nucleus                                    |
| Hypothalamus   | PMv          | Ventral premammillary nucleus                                |
| Hypothalamus   | PMd          | Dorsal premammillary nucleus                                 |
| Hypothalamus   | AVPV         | Anteroventral periventricular nucleus                        |
| Thalamus       | VM           | Ventral medial nucleus of the thalamus                       |
| Midbrain       | SCig         | Superior colliculus, motor related, intermediate gray layer  |
| Midbrain       | APN          | Anterior pretectal nucleus                                   |
| Thalamus       | SPFm         | Subparafascicular nucleus, magnocellular part                |
| Hypothalamus   | PSTN         | Parasubthalamic nucleus                                      |
| Hypothalamus   | VMPO         | Ventromedial preoptic nucleus                                |
| Hypothalamus   | PVp          | Periventricular hypothalamic nucleus, posterior part         |
| Isocortex      | RSPv5        | Retrosplenial area, ventral part, layer 5                    |
| Midbrain       | SCdw         | Superior colliculus, motor related, deep white layer         |
| Thalamus       | PR           | Perireunensis nucleus                                        |

|              |     |                                                |
|--------------|-----|------------------------------------------------|
| Striatum     | LSv | Lateral septal nucleus, ventral part           |
| Midbrain     | RN  | Red nucleus                                    |
| Pons         | PCG | Pontine central gray                           |
| Hypothalamus | FF  | Fields of Forel                                |
| Thalamus     | PT  | Parataenial nucleus                            |
| Hypothalamus | AVP | Anteroventral preoptic nucleus                 |
| Thalamus     | LGv | Ventral part of the lateral geniculate complex |
| Midbrain     | PRC | Precommissural nucleus                         |
